# Supplementary material for: Temperature-Responsive Poly(ɛ-caprolactone) Cell Culture Platform with Dynamically Tunable Nano-Roughness and Elasticity for Control of Myoblast Morphology
Source: PubMed Central journal article supplement (PMC3907883; doi:10.3390/ijms15011511), 2014-01-21
Supplement: ijms-15-01511-s001.pdf [file ijms-15-01511-s001.pdf]

## Supplementary Information

**Figure S1.** Digital photographs and topographic surface images of crosslinked PCL with reversibly tunable (a) elasticity and (b) surface nano-roughness. AFM images at various temperatures were obtained in the  $50\ \mu\text{m} \times 50\ \mu\text{m}$  scan range.

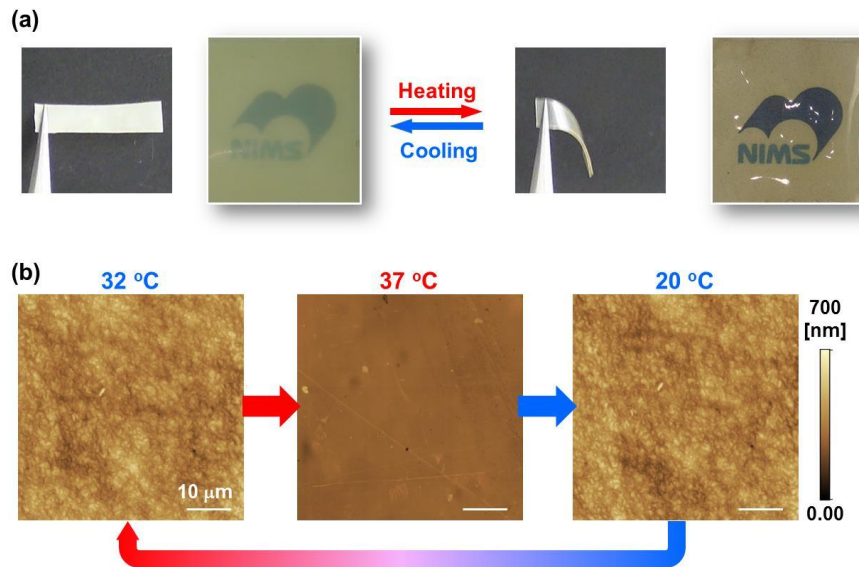

**Figure S2.** Stress-strain curves of crosslinked PCL with various 2b/4bPCL-m ratios at 25, 30, 35, 40 and 45 °C.

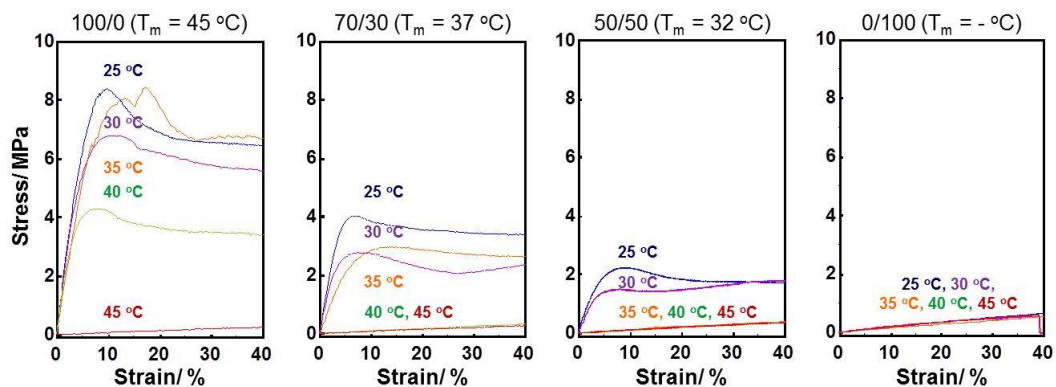

**Figure S3.** Phase images of PLC films observed by AFM at 25 °C (left) and 45 °C (right). All images were obtained in the  $20\ \mu\text{m} \times 20\ \mu\text{m}$  scan range.

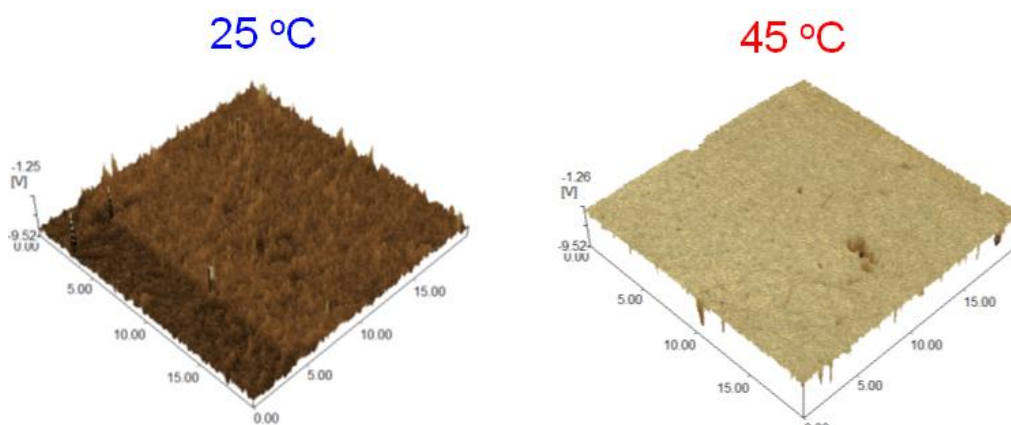

**Figure S4.** (a) Topographic surface and (b) 3D AFM images of 50/50 PCL films observed by AFM at 32 °C (left) and 37 °C (right). All images were obtained in the 20 μm × 20 μm scan range.

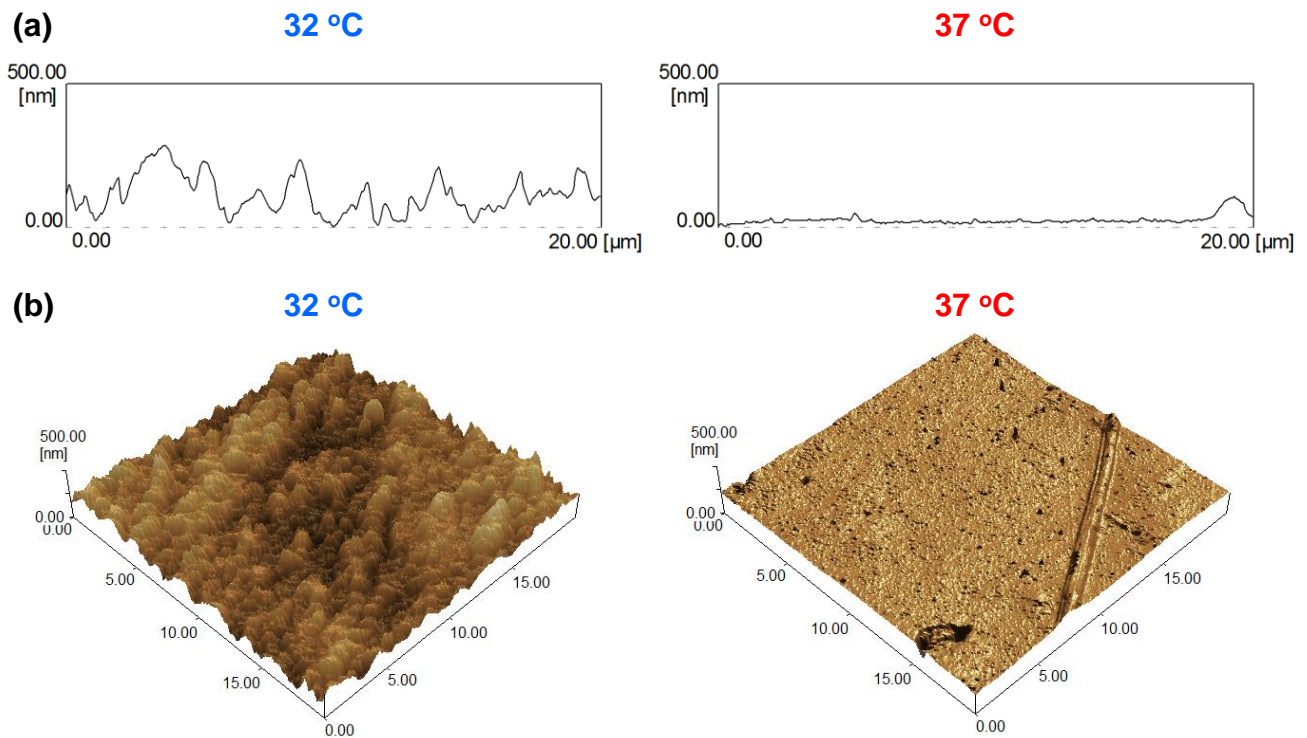

**Table S1.** Summary of the physical property (elasticity and surface roughness) of 50/50 PCL films in cell culture conditions (32 and 37 °C).

| 2b/4bPCL | Elasticity (MPa) |            | Roughness (nm) |       |
|----------|------------------|------------|----------------|-------|
|          | 32 °C            | 37 °C      | 32 °C          | 37 °C |
| 50/50    | 26.4 (±2.7)      | 1.1 (±0.3) | 63.4           | 12.4  |
